# Supplementary material for: β‐Carotene Impacts the Liver microRNA Profile in a Sex‐Specific Manner in Mouse Offspring of Western Diet‐Fed Mothers: Results from Microarray Analysis by Direct Hybridization
Source: Preprints.org preprint supplement (doi:10.20944/preprints202404.1692.v1), 2024-04-25
Supplement: Supplementary file 1 [file supplementary]

## Supplementary Materials

**Table S1.** Biometric parameters at sacrifice

|                                        | CONTROL   |           | BC        |            |
|----------------------------------------|-----------|-----------|-----------|------------|
|                                        | FEMALE    | MALE      | FEMALE    | MALE       |
| <b>Body weight (g)</b>                 | 11.9±0.37 | 13.7±0.53 | 11.1±0.35 | 12.5±0.17* |
| <b>BAT weight (mg)</b>                 | 74.1±5.63 | 63.7±9.04 | 59.7±4.56 | 65.9±4.04  |
| <b>Inguinal WAT weight (mg)</b>        | 167±5.15  | 149±14.27 | 138±19.94 | 125±9.30   |
| <b>Retroperitoneal WAT weight (mg)</b> | 27.8±2.82 | 23.1±2.77 | 18.3±1.58 | 18.2±0.83* |
| <b>Gonadal WAT weight (mg)</b>         | 59.1±2.30 | 129±15.8  | 59.2±10.9 | 102±3.06*  |
| <b>VAT/SAT ratio<sup>a</sup></b>       | 0.52±0.04 | 1.03±0.07 | 0.59±0.15 | 0.99±0.07  |
| <b>Liver weight (mg)</b>               | 703±42.4  | 736±43.2  | 619±8.91  | 645±60.4   |
| <b>Liver index<sup>b</sup></b>         | 5.94±0.34 | 5.36±0.17 | 5.58±0.26 | 5.15±0.43  |

The offspring of Western diet-fed mouse dams was orally supplemented with placebo (control group) or beta-carotene (BC) from day 2 to day 21 of life and sacrificed at day 26 when tissues were sampled. BAT, brown adipose tissue; WAT, white adipose tissue; VAT, visceral adipose tissue; SAT, subcutaneous adipose tissue; <sup>a</sup> ratio between VAT (gonadal plus retroperitoneal) and SAT (inguinal) depots mass; <sup>b</sup> liver weight expressed as a percentage of body weight. \*, p<0.05, BC vs CONTROL, Student's *t*-test.

**Table S2.** Overlapping target genes in both sexes of miRNAs differentially expressed with neonatal beta-carotene (BC) supplementation in the liver of mouse offspring of Western diet-fed mothers and the DE miRNAs related to their regulation

| Gene     | MALE MICE                                      |                  | FEMALE MICE                                                                  |                              |
|----------|------------------------------------------------|------------------|------------------------------------------------------------------------------|------------------------------|
|          | miRNAs                                         | Regulation by BC | miRNAs                                                                       | Regulation by BC             |
| Abhd13   | mmu-miR-468-3p                                 | Up               | mmu-miR-320-3p                                                               | Down                         |
| Abtb1    | mmu-miR-762                                    | Up               | <b>mmu-miR-125b-5p*</b>                                                      | Up                           |
| Adam22   | mmu-miR-1967                                   | Up               | mmu-miR-182-5p                                                               | Down                         |
| Adamtsl3 | mmu-miR-762                                    | Up               | mmu-miR-485-5p                                                               | Down                         |
| Agap1    | mmu-miR-684                                    | Up               | mmu-miR-320-3p                                                               | Down                         |
| Arrb1    | mmu-miR-762                                    | Up               | mmu-miR-133b-3p                                                              | Down                         |
| Asxl3    | mmu-miR-684                                    | Up               | mmu-miR-182-5p<br>mmu-miR-362-3p                                             | Down<br>Up                   |
| Atxn1    | mmu-miR-684                                    | Up               | mmu-miR-103-3p<br>mmu-miR-125a-5p<br><b>mmu-miR-362-3p*</b><br>mmu-miR-93-5p | Down<br>Down<br>Down<br>Down |
| Blcap    | mmu-miR-467a-5p<br>mmu-miR-762                 | Up<br>Up         | mmu-miR-320-3p                                                               | Down                         |
| Bmerb1   | mmu-miR-762                                    | Up               | mmu-miR-362-3p                                                               | Up                           |
| Btbd7    | mmu-miR-467a-5p                                | Up               | mmu-miR-93-5p                                                                | Up                           |
| Btrc     | mmu-miR-762                                    | Up               | mmu-miR-103-3p                                                               | Up                           |
| Cacna1b  | mmu-miR-762                                    | Up               | mmu-miR-133b-3p<br>mmu-miR-125a-5p<br>mmu-miR-125b-5p                        | Down<br>Up<br>Up             |
| Cadm2    | mmu-miR-468-3p<br>mmu-miR-684                  | Up<br>Up         | mmu-miR-93-5p                                                                | Up                           |
| Celf1    | mmu-miR-762                                    | Up               | mmu-miR-133b-3p                                                              | Down                         |
| Cers6    | mmu-miR-1967                                   | Up               | mmu-miR-320-3p                                                               | Down                         |
| Cntn2    | mmu-miR-762                                    | Up               | mmu-miR-668-3p                                                               | Down                         |
| Cplx3    | mmu-miR-762                                    | Up               | mmu-miR-1968-5p                                                              | Down                         |
| Csnk1g1  | mmu-miR-762                                    | Up               | mmu-miR-708-5p<br>mmu-miR-93-5p                                              | Down<br>Up                   |
| Cux1     | mmu-miR-1967<br>mmu-miR-467a-5p<br>mmu-miR-684 | Up<br>Up<br>Up   | mmu-miR-133b-3p<br>mmu-miR-320-3p                                            | Down<br>Down                 |
| Dab2ip   | mmu-miR-762                                    | Up               | mmu-miR-182-5p                                                               | Down                         |
| Dazap2   | mmu-miR-1967                                   | Up               | mmu-miR-125a-5p                                                              | Up                           |
| Dcun1d1  | mmu-miR-1967                                   | Up               | mmu-miR-182-5p                                                               | Down                         |
| Dgcr8    | mmu-miR-468-3p                                 | Up               | mmu-miR-103-3p                                                               | Up                           |
| Dync1li2 | mmu-miR-467a-5p                                | Up               | mmu-miR-182-5p<br>mmu-miR-103-3p                                             | Down<br>Up                   |
| Egflam   | mmu-miR-468-3p                                 | Up               | mmu-miR-103-3p                                                               | Up                           |
| Eif4a2   | mmu-miR-762                                    | Up               | mmu-miR-103-3p                                                               | Up                           |
| Eif5a2   | mmu-miR-467a-5p                                | Up               | mmu-miR-125a-5p                                                              | Up                           |
| Emc10    | mmu-miR-762                                    | Up               | mmu-miR-485-5p                                                               | Down                         |
| Enah     | mmu-miR-684                                    | Up               | mmu-miR-224-5p                                                               | Down                         |
| Erc1     | mmu-miR-762                                    | Up               | mmu-miR-93-5p                                                                | Up                           |
| Etv3     | mmu-miR-1964-3p                                | Up               | mmu-miR-103-3p                                                               | Up                           |
| Fam168a  | mmu-miR-684                                    | Up               | mmu-miR-182-5p                                                               | Down                         |
| Fbxo41   | mmu-miR-762                                    | Up               | mmu-miR-182-5p                                                               | Down                         |
| Foxp2    | mmu-miR-762                                    | Up               | mmu-miR-182-5p                                                               | Down                         |
| Frmd8    | mmu-miR-762                                    | Up               | mmu-miR-370-3p                                                               | Down                         |

|           |                                        |          |                                                      |                  |
|-----------|----------------------------------------|----------|------------------------------------------------------|------------------|
| Fzd3      | mmu-miR-762                            | Up       | mmu-miR-320-3p                                       | Down             |
| Kalrn     | mmu-miR-684                            | Up       | mmu-miR-323-3p                                       | Down             |
| Kcnk10    | mmu-miR-762                            | Up       | mmu-miR-125a-5p<br>mmu-miR-125b-5p<br>mmu-miR-182-5p | Up<br>Up<br>Down |
| Kpna1     | mmu-miR-684                            | Up       | mmu-miR-103-3p                                       | Up               |
| Lhx6      | mmu-miR-467a-5p<br><b>mmu-miR-684*</b> | Up<br>Up | mmu-miR-93-5p                                        | Up               |
| Lin28b    | mmu-miR-467a-5p                        | Up       | mmu-miR-103-3p                                       | Up               |
| Mfap3l    | mmu-miR-468-3p                         | Up       | mmu-miR-93-5p                                        | Up               |
| Mktn1     | mmu-miR-467a-5p                        | Up       | mmu-miR-93-5p                                        | Up               |
| Myrf      | mmu-miR-467a-5p                        | Up       | mmu-miR-133b-3p                                      | Down             |
| Nav1      | <b>mmu-miR-1967*</b>                   | Up       | mmu-miR-103-3p                                       | Up               |
| Ndel1     | mmu-miR-762                            | Up       | mmu-miR-103-3p                                       | Up               |
| Nfib      | mmu-miR-467a-5p<br>mmu-miR-684         | Up<br>Up | mmu-miR-125a-5p                                      | Up               |
| Osbp16    | mmu-miR-468-3p                         | Up       | mmu-miR-103-3p                                       | Up               |
| Otud7b    | mmu-miR-762                            | Up       | mmu-miR-133b-3p<br>mmu-miR-320-3p                    | Down<br>Down     |
| Pbx1      | mmu-miR-1967                           | Up       | mmu-miR-125a-5p                                      | Up               |
| Pik3r1    | mmu-miR-762                            | Up       | mmu-miR-320-3p<br><b>mmu-miR-103-3p*</b>             | Down<br>Up       |
| Plagl1    | mmu-miR-1967                           | Up       | mmu-miR-125a-5p                                      | Up               |
| Ppp1r16b  | mmu-miR-762                            | Up       | mmu-miR-320-3p                                       | Down             |
| Prdm16    | mmu-miR-467a-5p                        | Up       | mmu-miR-182-5p                                       | Down             |
| Prlr      | mmu-miR-1967                           | Up       | mmu-miR-182-5p<br>mmu-miR-485-5p                     | Down<br>Down     |
| Prr14l    | mmu-miR-762                            | Up       | mmu-miR-93-5p                                        | Up               |
| Rad18     | mmu-miR-467a-5p                        | Up       | mmu-miR-320-3p                                       | Down             |
| Retreg3   | mmu-miR-1967                           | Up       | mmu-miR-125a-5p                                      | Up               |
| Rora      | mmu-miR-1967                           | Up       | mmu-miR-103-3p<br>mmu-miR-125b-5p<br>mmu-miR-370-3p  | Up<br>Up<br>Down |
| Runx1t1   | mmu-miR-1967                           | Up       | mmu-miR-133b-3p                                      | Down             |
| Sbno1     | mmu-miR-1967                           | Up       | mmu-miR-103-3p<br>mmu-miR-125a-5p<br>mmu-miR-125b-5p | Up<br>Up<br>Up   |
| Slc6a17   | mmu-miR-762                            | Up       | mmu-miR-125a-5p<br>mmu-miR-125b-5p                   | Up<br>Up         |
| Slc7a1    | mmu-miR-762                            | Up       | <b>mmu-miR-122-5p*</b>                               | Up               |
| Slc8a1    | mmu-miR-762                            | Up       | mmu-miR-103-3p<br>mmu-miR-362-3p                     | Up<br>Up         |
| Sntb2     | mmu-miR-1967                           | Up       | mmu-miR-93-5p                                        | Up               |
| Soga1     | mmu-miR-762                            | Up       | mmu-miR-320-3p                                       | Down             |
| St8sia2   | mmu-miR-468-3p                         | Up       | mmu-miR-485-5p                                       | Down             |
| Stard13   | mmu-miR-684                            | Up       | mmu-miR-182-5p                                       | Down             |
| Stum      | mmu-miR-762                            | Up       | mmu-miR-668-3p                                       | Down             |
| Suv39h1   | mmu-miR-467a-5p                        | Up       | mmu-miR-125a-5p                                      | Up               |
| Taf9b     | mmu-miR-467a-5p                        | Up       | mmu-miR-125b-5p                                      | Up               |
| Tnrc6b    | mmu-miR-467a-5p                        | Up       | mmu-miR-362-3p                                       | Up               |
| Trp53inp1 | mmu-miR-468-3p                         | Up       | mmu-miR-93-5p<br>mmu-miR-125b-5p                     | Up<br>Up         |
| Trps1     | mmu-miR-684                            | Up       | mmu-miR-125a-5p                                      | Up               |
| Tspan18   | mmu-miR-762                            | Up       | mmu-miR-485-5p                                       | Down             |
| Ube2l3    | mmu-miR-762                            | Up       | mmu-miR-125b-5p                                      | Up               |

|         |                                   |          |                                    |              |
|---------|-----------------------------------|----------|------------------------------------|--------------|
| Ubn2    | mmu-miR-684                       | Up       | mmu-miR-224-5p<br>mmu-miR-320-3p   | Down<br>Down |
| Ubxn2b  | mmu-miR-468-3p                    | Up       | mmu-miR-93-5p                      | Up           |
| Usf3    | mmu-miR-684                       | Up       | mmu-miR-122-5p                     | Up           |
| Xpo7    | <b>mmu-miR-762*</b>               | Up       | mmu-miR-668-3p                     | Down         |
| Zbtb37  | mmu-miR-467a-5p                   | Up       | mmu-miR-182-5p                     | Down         |
| Zc3h12c | mmu-miR-467a-5p<br>mmu-miR-468-3p | Up<br>Up | mmu-miR-93-5p<br>mmu-miR-103-3p    | Up<br>Up     |
| Zfp174  | mmu-miR-762                       | Up       | mmu-miR-224-5p                     | Down         |
| Zfp704  | mmu-miR-684                       | Up       | mmu-miR-182-5p                     | Down         |
| Znrf3   | mmu-miR-467a-5p                   | Up       | mmu-miR-125a-5p<br>mmu-miR-133b-3p | Up<br>Down   |

\*Bold highlight indicates the miRNAs validated for the gene.

**Table S3.** KEGG pathway adscriptions of overlapping target genes in both sexes of miRNAs differentially expressed with neonatal beta-carotene supplementation in the liver of mouse offspring of Western diet-fed mothers

| <b>FEMALE MICE- target-miRNA downregulated</b> |                                                          |                         |
|------------------------------------------------|----------------------------------------------------------|-------------------------|
| <b>ID pathway</b>                              | <b>Pathways</b>                                          | <b>Gene</b>             |
| mmu05207                                       | Chemical carcinogenesis - receptor activation            | Cacna1b, Pik3r1, Arrb1, |
| mmu05205                                       | Proteoglycans in cancer                                  | Pik3r1, Fdz3            |
| mmu04010                                       | MAPK signaling pathway                                   | Cacna1b, Arrb1          |
| mmu04810                                       | Regulation of actin cytoskeleton                         | Enah,                   |
| mmu04360                                       | Axon guidance                                            | Enah, Pik3r1, Fdz3,     |
| mmu05211                                       | Renal cell carcinoma                                     | Pik3r1                  |
| mmu04015                                       | Rap1 signaling pathway                                   | Enah,Pik3r1             |
| mmu05223                                       | Non-small cell lung cancer                               | Pik3r1                  |
| mmu04062                                       | Chemokine signaling pathway                              | Pik3r1, Arrb1           |
| mmu04510                                       | Focal adhesion                                           | Pik3r1                  |
| mmu04071                                       | Sphingolipid signaling pathway                           | Cers6, Pik3r1           |
| mmu04550                                       | Signaling pathways regulating pluripotency of stem cells | Pik3r1, Fdz3            |
| mmu04666                                       | Fc gamma R-mediated phagocytosis                         | Pik3r1                  |
| mmu05218                                       | Melanoma                                                 | Pik3r1                  |
| mmu04722                                       | Neurotrophin signaling pathway                           | Pik3r1                  |
| mmu05212                                       | Pancreatic cancer                                        | Pik3r1                  |
| mmu05220                                       | Chronic myeloid leukemia                                 | Pik3r1                  |
| mmu04144                                       | Endocytosis                                              | Agap1, Arrb1            |
| mmu04068                                       | FoxO signaling pathway                                   | Pik3r1                  |
| mmu04012                                       | ErbB signaling pathway                                   | Pik3r1                  |
| mmu04211                                       | Longevity regulating pathway                             | Pik3r1                  |
| mmu05225                                       | Hepatocellular carcinoma                                 | Pik3r1, fdz3            |
| mmu04670                                       | Leukocyte transendothelial migration                     | Pik3r1                  |
| mmu05226                                       | Gastric cancer                                           | Pik3r1, fdz3            |
| mmu05221                                       | Acute myeloid leukemia                                   | Pik3r1, Runx1t1         |
| mmu04070                                       | Phosphatidylinositol signaling system                    | Pik3r1                  |
| mmu04611                                       | Platelet activation                                      | Pik3r1                  |
| mmu05417                                       | Lipid and atherosclerosis                                | Pik3r1                  |
| mmu04390                                       | Hippo signaling pathway                                  | Fzd3                    |
| mmu04917                                       | Prolactin signaling pathway                              | Prlr, Pik3r1            |
| mmu04024                                       | cAMP signaling pathway                                   | Pik3r1                  |
| mmu04660                                       | T cell receptor signaling pathway                        | Pik3r1                  |
| mmu04934                                       | Cushing syndrome                                         | Fdz3                    |
| mmu01521                                       | EGFR tyrosine kinase inhibitor resistance                | Pik3r1                  |
| mmu00600                                       | Sphingolipid metabolism                                  | Cers6                   |
| mmu05017                                       | Spinocerebellar ataxia                                   | Pik3r1, Rora            |
| mmu04923                                       | Regulation of lipolysis in adipocytes                    | Pik3r1                  |
| mmu04140                                       | Autophagy - animal                                       | Pik3r1                  |
| mmu04340                                       | Hedgehog signaling pathway                               | Csnk1g1, Arrb1          |
| mmu05213                                       | Endometrial cancer                                       | Pik3r1                  |
| mmu05224                                       | Breast cancer                                            | Pik3r1, Fdz3            |
| mmu03013                                       | Nucleocytoplasmic transport                              | Xpo7                    |
| mmu04935                                       | Growth hormone synthesis, secretion and action           | Pik3r1                  |
| mmu05210                                       | Colorectal cancer                                        | Pik3r1                  |
| mmu04213                                       | Longevity regulating pathway - multiple species          | Pik3r1                  |
| <b>FEMALE MICE- target-miRNA upregulated</b>   |                                                          |                         |
| mmu04330                                       | Notch signaling pathway                                  | Atxn1,                  |
| mmu04710                                       | Circadian rhythm                                         | Rora, Btrc              |

|                                            |                                                           |                        |
|--------------------------------------------|-----------------------------------------------------------|------------------------|
| mmu05223                                   | Non-small cell lung cancer                                | Pik3r1                 |
| mmu01522                                   | Endocrine resistance                                      | Pik3r1                 |
| mmu05222                                   | Small cell lung cancer                                    | Pik3r1                 |
| mmu05220                                   | Chronic myeloid leukemia                                  | Pik3r1                 |
| mmu04340                                   | Hedgehog signaling pathway                                | Btrc                   |
| mmu05224                                   | Breast cancer                                             | Pik3r1                 |
| mmu05207                                   | Chemical carcinogenesis - receptor activation             | Cacna1b, Kpna1, Pik3r1 |
| mmu04218                                   | Cellular senescence                                       | Btrc, Pik3r1           |
| mmu04668                                   | TNF signaling pathway                                     | Pik3r1                 |
| mmu04140                                   | Autophagy - animal                                        | Pik3r1                 |
| mmu04917                                   | Prolactin signaling pathway                               | Pik3r1                 |
| mmu05214                                   | Glioma                                                    | Pik3r1                 |
| mmu04310                                   | Wnt signaling pathway                                     | Btrc, Znf3             |
| mmu05212                                   | Pancreatic cancer                                         | Pik3r1                 |
| mmu05215                                   | Prostate cancer                                           | Pik3r1                 |
| mmu05169                                   | Epstein-Barr virus infection                              | Pik3r1                 |
| mmu05226                                   | Gastric cancer                                            | Pik3r1                 |
| mmu04152                                   | AMPK signaling pathway                                    | Pik3r1                 |
| mmu05165                                   | Human papillomavirus infection                            | Pik3r1                 |
| mmu04390                                   | Hippo signaling pathway                                   | Btrc                   |
| mmu05206                                   | MicroRNAs in cancer                                       | Pik3r1                 |
| mmu05161                                   | Hepatitis B                                               | Pik3r1                 |
| mmu05160                                   | Hepatitis C                                               | Pik3r1                 |
| mmu04550                                   | Signaling pathways regulating pluripotency of stem cells  | Pik3r1                 |
| mmu05167                                   | Kaposi sarcoma-associated herpesvirus infection           | Pik3r1                 |
| mmu05410                                   | Hypertrophic cardiomyopathy                               | Slc8a1, Pik3r1         |
| mmu05225                                   | Hepatocellular carcinoma                                  | Pik3r1                 |
| mmu05218                                   | Melanoma                                                  | Pik3r1                 |
| mmu05412                                   | Arrhythmogenic right ventricular cardiomyopathy           | Slc8a1                 |
| mmu04370                                   | VEGF signaling pathway                                    | Pik3r1                 |
| mmu04010                                   | MAPK signaling pathway                                    | Cacna1b                |
| mmu04066                                   | HIF-1 signaling pathway                                   | Pik3r1                 |
| mmu05022                                   | Pathways of neurodegeneration - multiple diseases         | Cacna1b, Atxn1         |
| mmu05162                                   | Measles                                                   | Pik3r1                 |
| mmu05211                                   | Renal cell carcinoma                                      | Pik3r1                 |
| mmu05414                                   | Dilated cardiomyopathy                                    | Slc8a1                 |
| mmu04071                                   | Sphingolipid signaling pathway                            | Pik3r1                 |
| mmu04068                                   | FoxO signaling pathway                                    | Pik3r1                 |
| mmu04978                                   | Mineral absorption                                        | Slc8a1                 |
| mmu05017                                   | Spinocerebellar ataxia                                    | Atxn1, Rora, Pik3r1    |
| mmu04935                                   | Growth hormone synthesis, secretion and action            | Pik3r1                 |
| mmu05210                                   | Colorectal cancer                                         | Pik3r1                 |
| mmu04360                                   | Axon guidance                                             | Pik3r1                 |
| mmu04961                                   | Endocrine and other factor-regulated calcium reabsorption | Slc8a1                 |
| mmu04261                                   | Adrenergic signaling in cardiomyocytes                    | Slc8a1,                |
| mmu04722                                   | Neurotrophin signaling pathway                            | Pik3r1                 |
| mmu05163                                   | Human cytomegalovirus infection                           | Pik3r1                 |
| <b>MALE MICE- target-miRNA upregulated</b> |                                                           |                        |
| mmu04360                                   | Axon guidance                                             | Enah, Pik3r1, Fdz3     |
| mmu04514                                   | Cell adhesion molecules                                   | Cntn2                  |
| mmu04728                                   | Dopaminergic synapse                                      | Cacna1b, arrb1         |
| mmu04926                                   | Relaxin signaling pathway                                 | Pik3r1, arrb1          |
| mmu04340                                   | Hedgehog signaling pathway                                | Btrc, arrb1            |
| mmu04012                                   | ErbB signaling pathway                                    | Pik3r1                 |

|          |                                                     |                               |
|----------|-----------------------------------------------------|-------------------------------|
| mmu04931 | Insulin resistance                                  | Pik3r1                        |
| mmu05170 | Human immunodeficiency virus 1 infection            | Btrc, Pik3r1                  |
| mmu04725 | Cholinergic synapse                                 | Cacna1b, Pik3r1               |
| mmu04015 | Rap1 signaling pathway                              | Enah, Pik3r1                  |
| mmu05032 | Morphine addiction                                  | Cacna1b, Arrb1                |
| mmu04670 | Leukocyte transendothelial migration                | Pik3r1                        |
| mmu05132 | Salmonella infection                                | Kpna1, Dync1li2               |
| mmu04710 | Circadian rhythm                                    | Rora, Btrc                    |
| mmu00600 | Sphingolipid metabolism                             | Cers6                         |
| mmu04010 | MAPK signaling pathway                              | Cacna1b, arrb1                |
| mmu04660 | T cell receptor signaling pathway                   | Pik3r1                        |
| mmu05142 | Chagas disease                                      | Pik3r1                        |
| mmu04151 | PI3K-Akt signaling pathway                          | Prlr, Pik3r1                  |
| mmu05165 | Human papillomavirus infection                      | Pik3r1                        |
| mmu04928 | Parathyroid hormone synthesis, secretion and action | Arrb1                         |
| mmu04371 | Apelin signaling pathway                            | Slc8a1,                       |
| mmu04668 | TNF signaling pathway                               | Pik3r1, Dab2ip                |
| mmu04727 | GABAergic synapse                                   | Cacna1b                       |
| mmu05207 | Chemical carcinogenesis - receptor activation       | Cacna1b, Pik3r1, Kpna1, Arrb1 |
| mmu04935 | Growth hormone synthesis, secretion and action      | Pik3r1                        |
| mmu04810 | Regulation of actin cytoskeleton                    | Enah, pik3r1                  |
| mmu01522 | Endocrine resistance                                | pik3r1                        |
| mmu05418 | Fluid shear stress and atherosclerosis              | pik3r1,                       |
| mmu04723 | Retrograde endocannabinoid signaling                | Cacna1b                       |
| mmu04722 | Neurotrophin signaling pathway                      | Pik3r1                        |
| mmu04014 | Ras signaling pathway                               | Pik3r1                        |
| mmu04930 | Type II diabetes mellitus                           | Cacna1b, Pik3r1               |
| mmu04071 | Sphingolipid signaling pathway                      | Cers6, Pik3r1,                |
| mmu05231 | Choline metabolism in cancer                        | Pik3r1                        |
| mmu04917 | Prolactin signaling pathway                         | Prlr, Pik3r1                  |
| mmu04721 | Synaptic vesicle cycle                              | Cacna1b                       |
| mmu04978 | Mineral absorption                                  | Slc8a1                        |
| mmu04915 | Estrogen signaling pathway                          | Pik3r1                        |
| mmu05160 | Hepatitis C                                         | Pik3r1                        |

**A**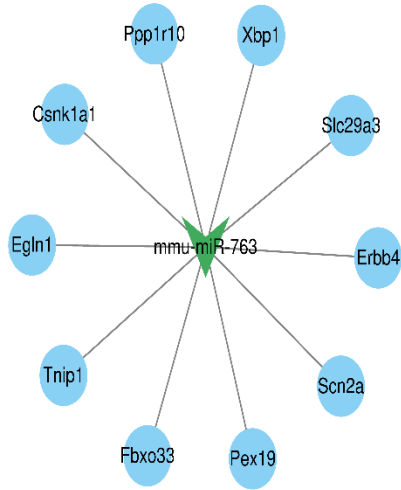**C**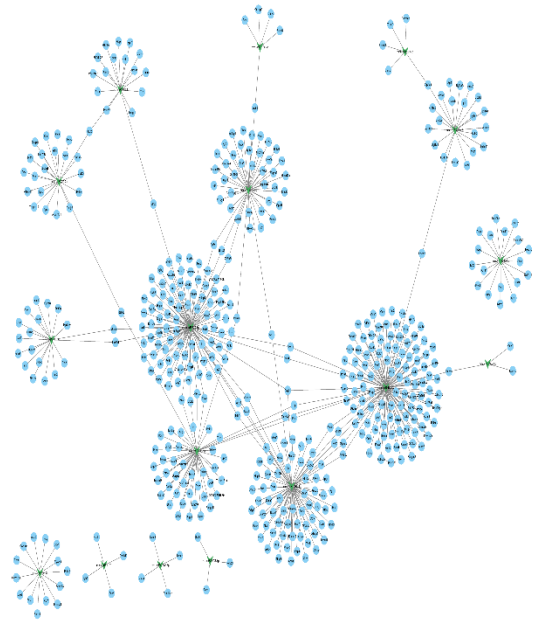**B**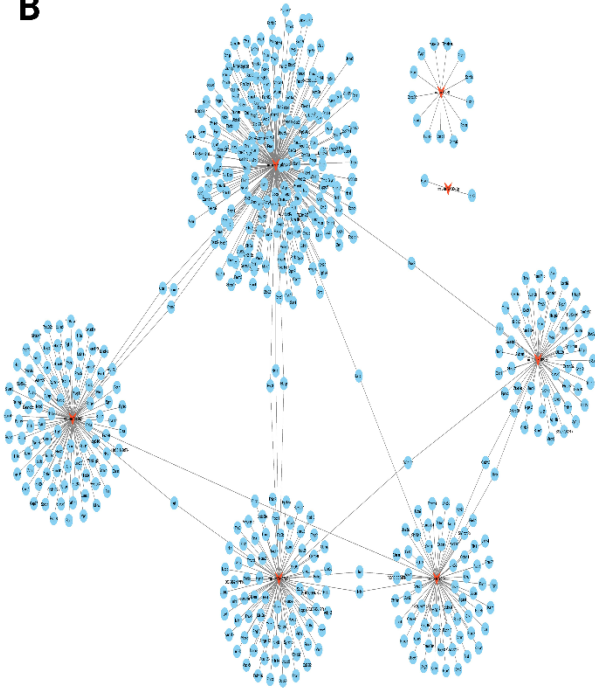**D**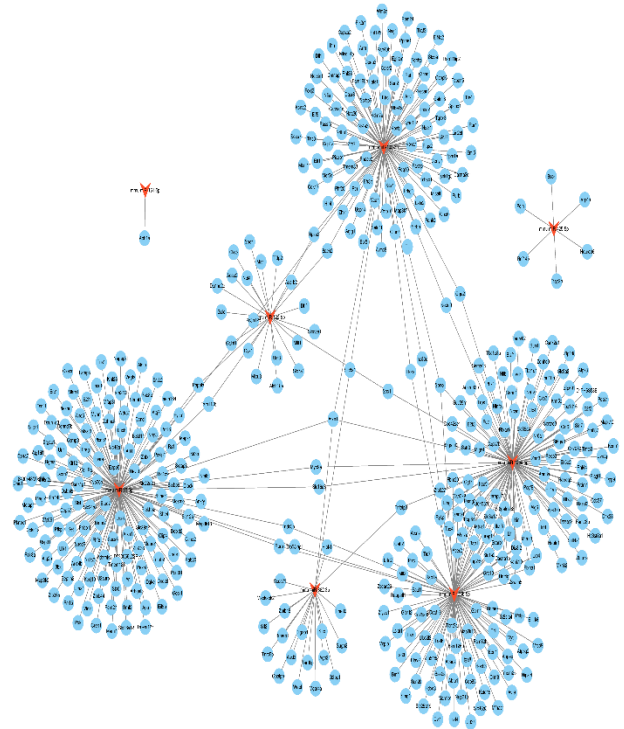

**Figure S1.** miRNA-gene interaction networks. The miRNAs found to be differentially expressed with neonatal beta-carotene (BC) supplementation in the liver of mice born from Western diet- fed dams and their predicted gene targets are illustrated as networks. Each individual node represents a miRNA or gene. **Networks are for: A)** The only miRNA found to be significantly downregulated in BC males **B)** Upregulated miRNAs in BC males **C)** Downregulated miRNAs in BC females **D)** Upregulated miRNAs in BC females.

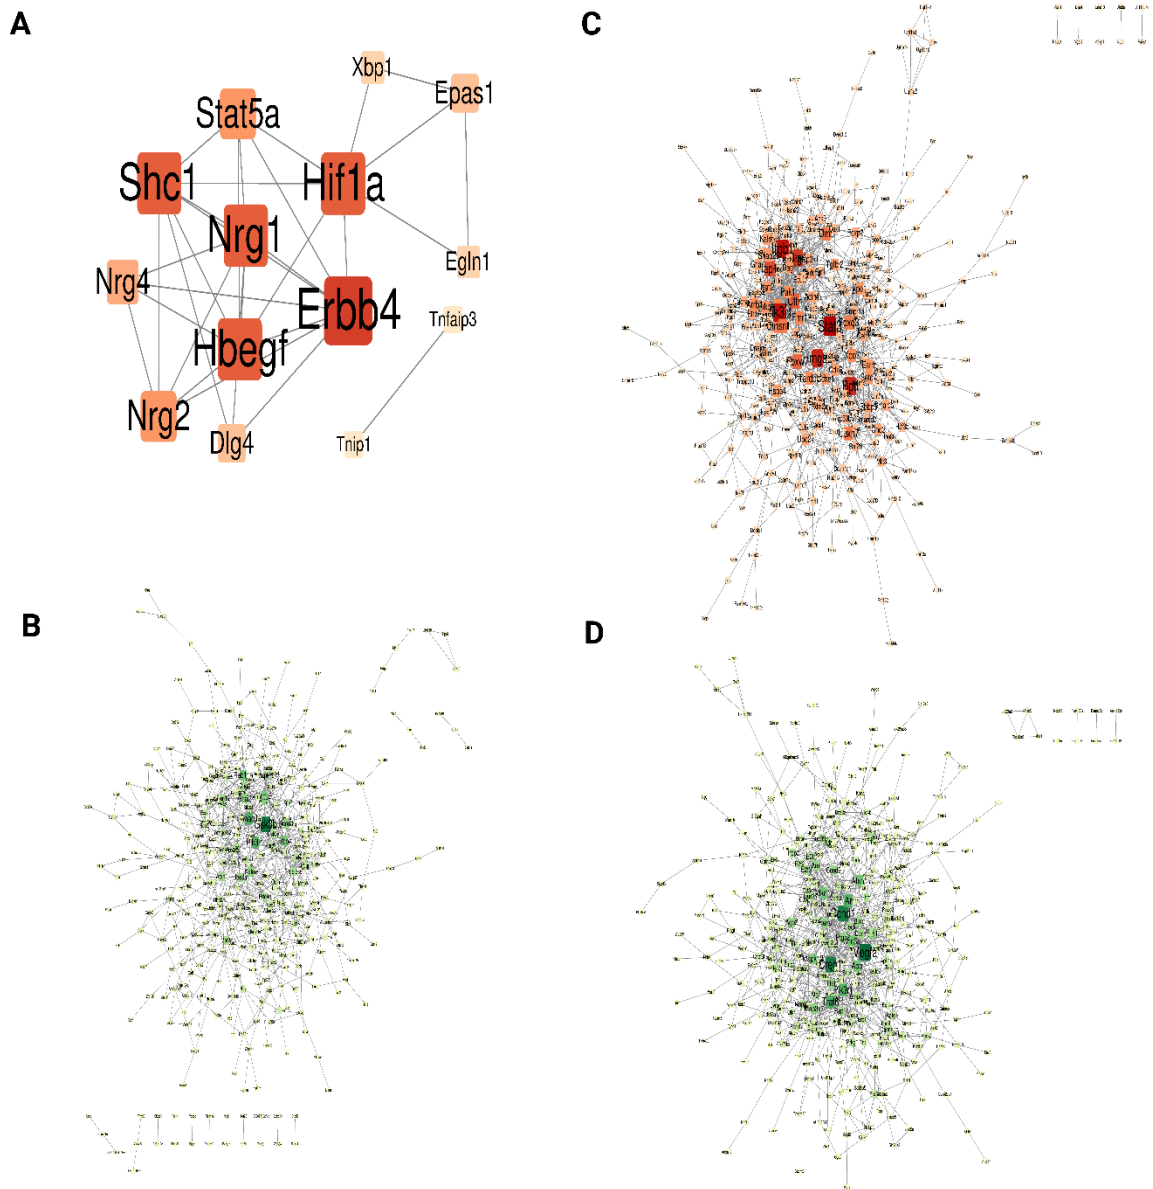

**Figure S2.** Protein-protein interaction (PPI) networks of predicted targets of the miRNAs differentially expressed with neonatal beta-carotene (BC) supplementation in the liver of offspring of Western diet-fed mouse dams. Each node is a protein, and an edge is an interaction between two proteins. **A)** PPI of the downregulated miRNA targets in BC males **B)** PPI of upregulated miRNA targets in BC males **C)** PPI of downregulated miRNA targets in BC females **D)** PPI of upregulated miRNA targets in BC females.
